# Supplementary material for: Aspergillus fumigatus Extracellular Vesicles Display Increased Galleria mellonella Survival but Partial Pro-Inflammatory Response by Macrophages
Source: MDPI journal article supplement (doi:10.3390/jof9050541), 2023-05-04
Supplement: s1 [file s1]

## Supplementary Material

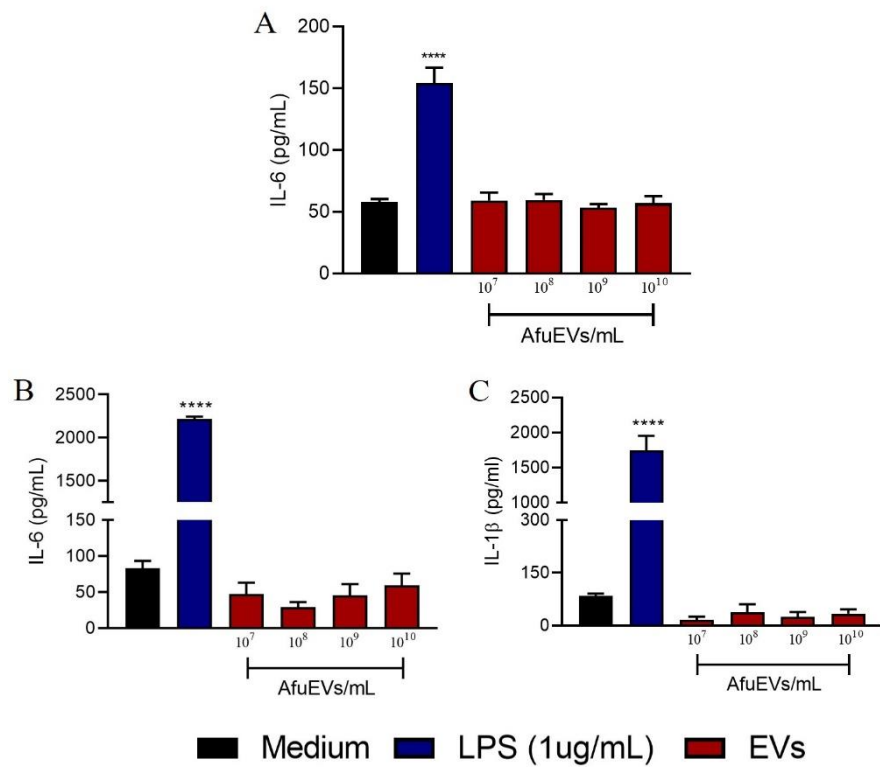

**Figure S1.** EVs fail to induce the production of IL-6 and IL-1β by macrophages. AMJ2-C11 (A) and RAW 264.7 (B and C) macrophages were stimulated with EVs (10<sup>7</sup> to 10<sup>10</sup> EVs/mL) for 24 h. The presence of IL-6 and IL-1β in the supernatant was determined. The results are expressed as mean ± SEM, and were compared to medium through one-way analysis of variance followed by Dunnett's test. \*\*\*\*  $p < 0.0001$ .

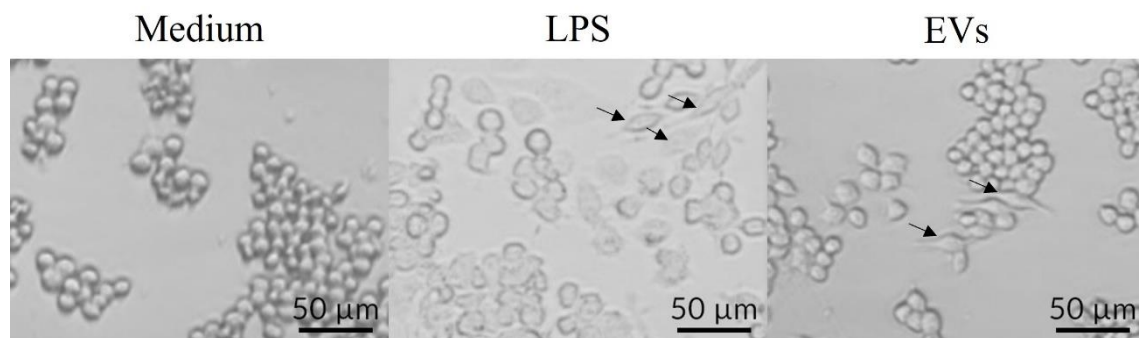

**Figure S2.** EVs induce membrane extended processes in RAW264.7 macrophages. RAW264.7 cells were stimulated for 24 h with medium alone, 10<sup>10</sup> EVs/mL, or LPS (1 μg/mL). Cells stimulated with EVs developed membrane protrusions indicating cellular activation and augmented expression of adhesion molecules. Black arrows show cells with membrane protrusions.

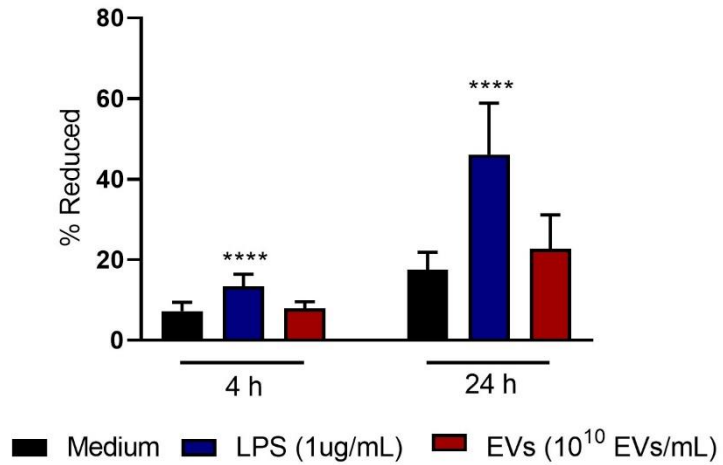

**Figure S3.** EVs fail to increase macrophage adhesion. RAW 264.7 macrophages were cultured in fibrinogen coated plates and stimulated with LPS (1  $\mu\text{g/mL}$ ) or 1010 EVs/mL. After washing with PBS, the remaining cells were incubated with Resazurin for detection of attached cells. The results are expressed as mean  $\pm$  SEM, and were compared to medium through one-way analysis of variance followed by Dunnett's test. \*\*\*\*  $p < 0.0001$ .
